# Supplementary material
Source: PubMed Central journal article supplement (PMC7297974)

A. Healthy Controls – BOLD response to reward anticipation

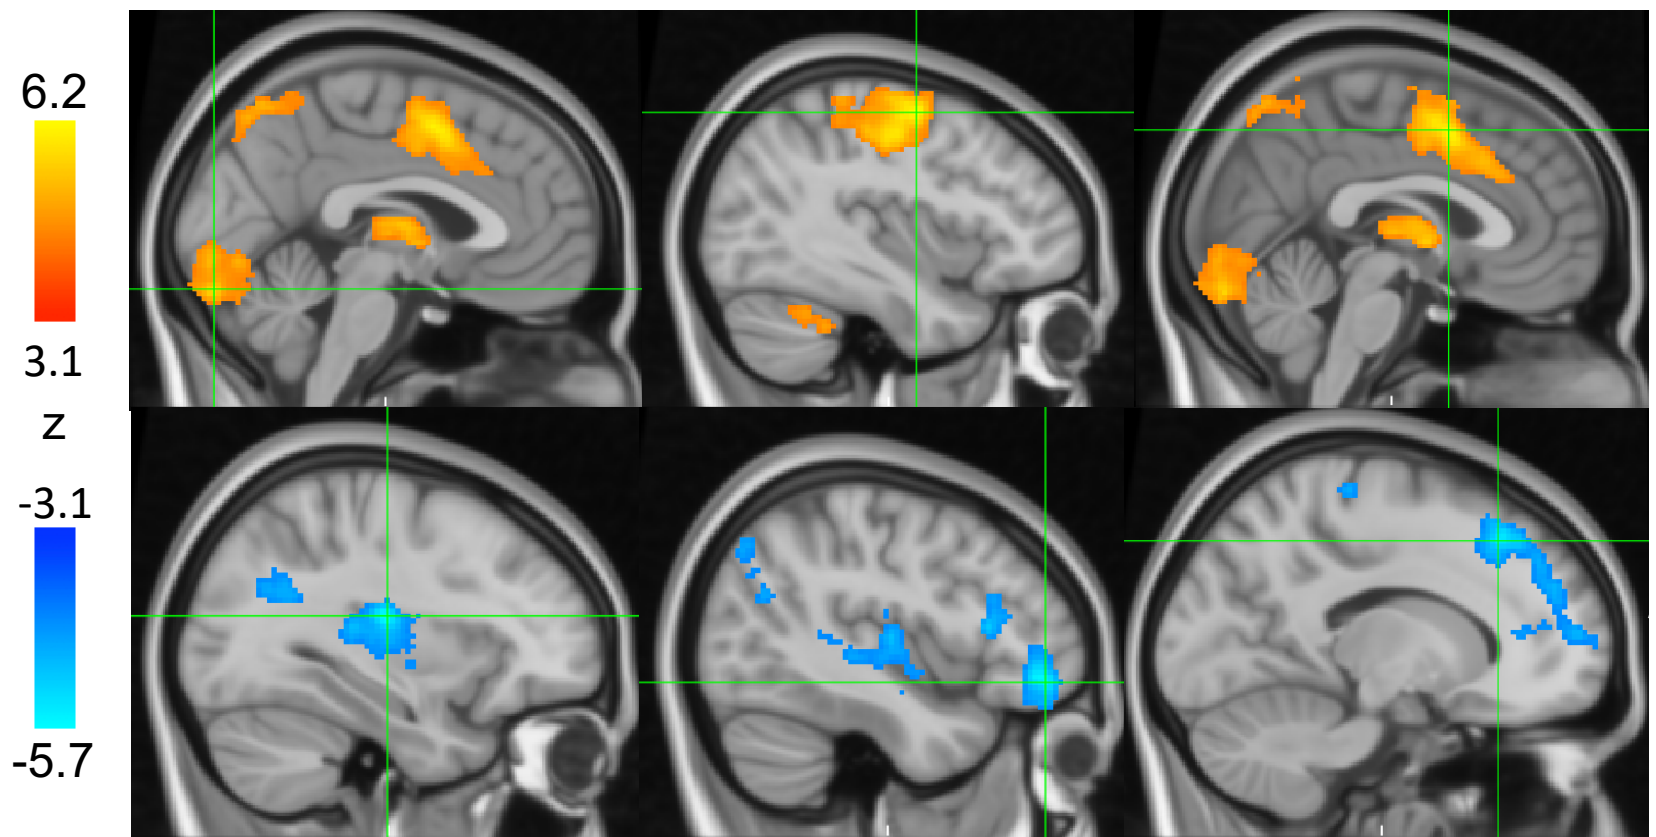

B. MDD – BOLD response to reward anticipation

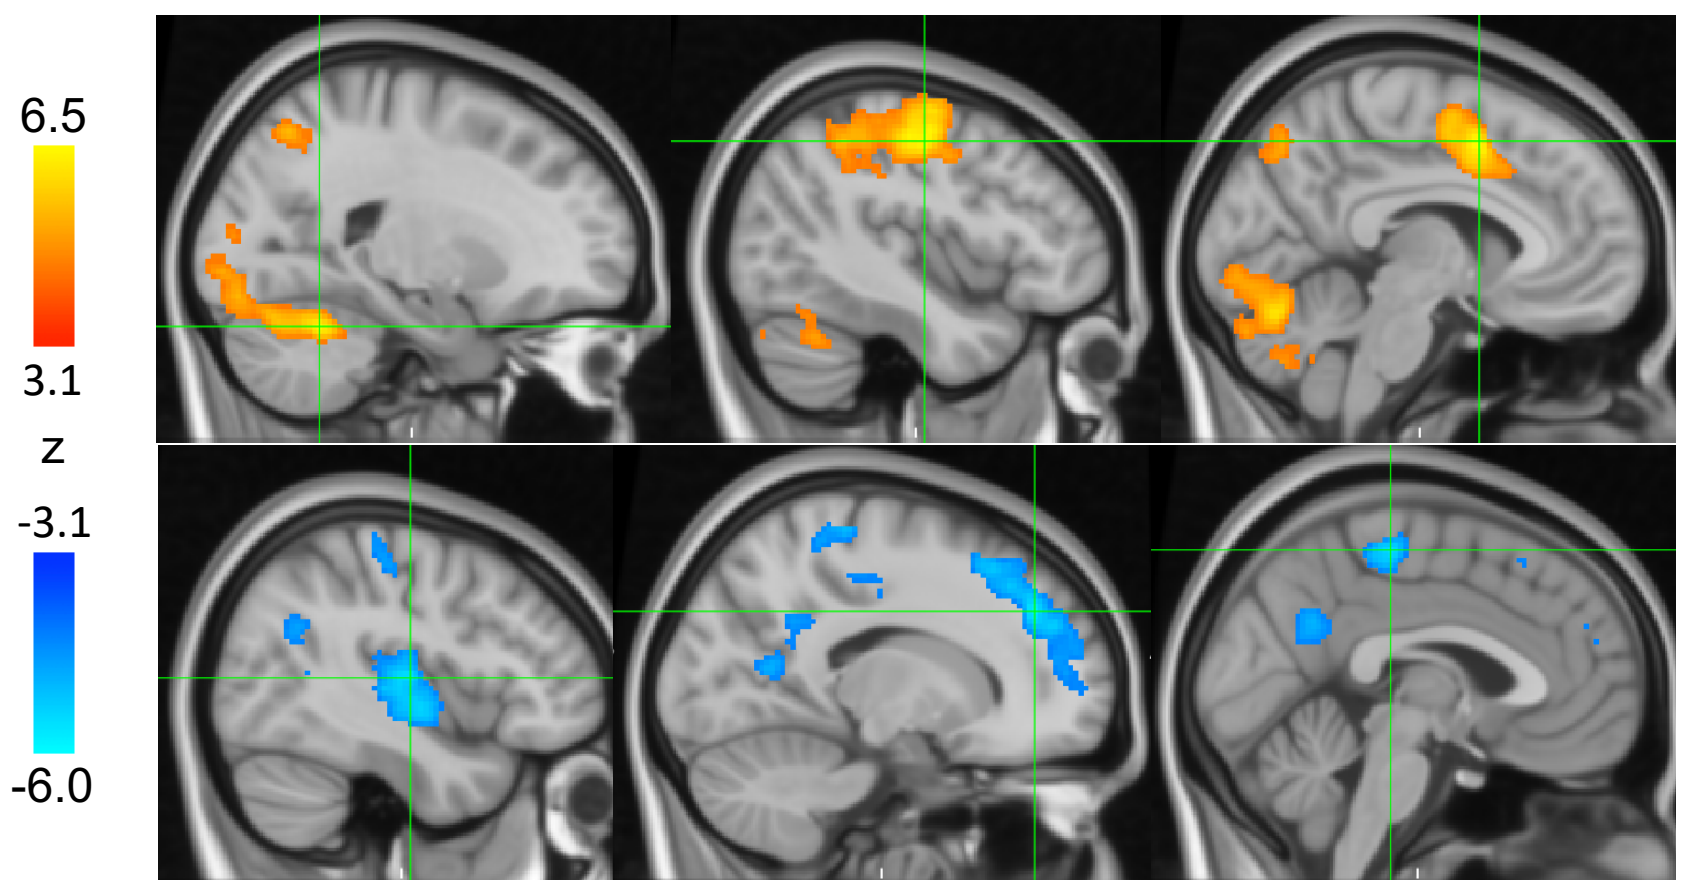

C. HC – VS gPPI

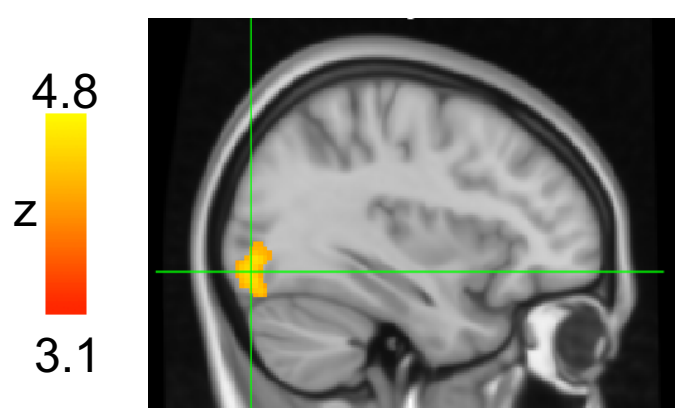

D. MDD – VS gPPI

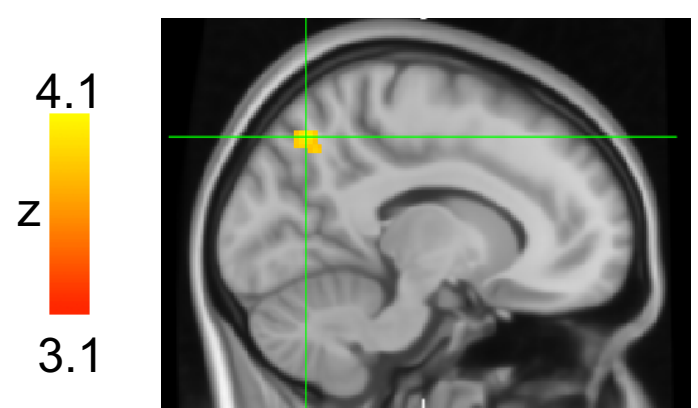

Supplement: 41386_2020_688_MOESM4_ESM.pdf [file 41386_2020_688_MOESM4_ESM.pdf]
