# Supplementary material
Source: PubMed Central journal article supplement (PMC7297974)

### A. Healthy Controls – BOLD response during Reward Consumption

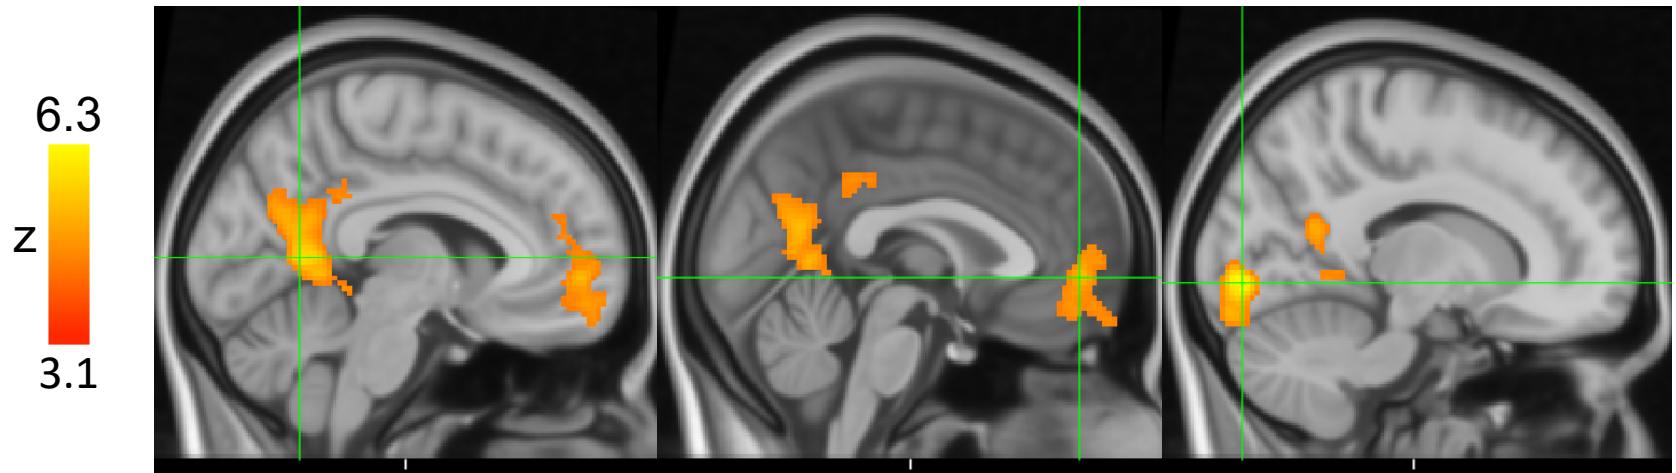

### B. MDD – BOLD response during Reward Consumption

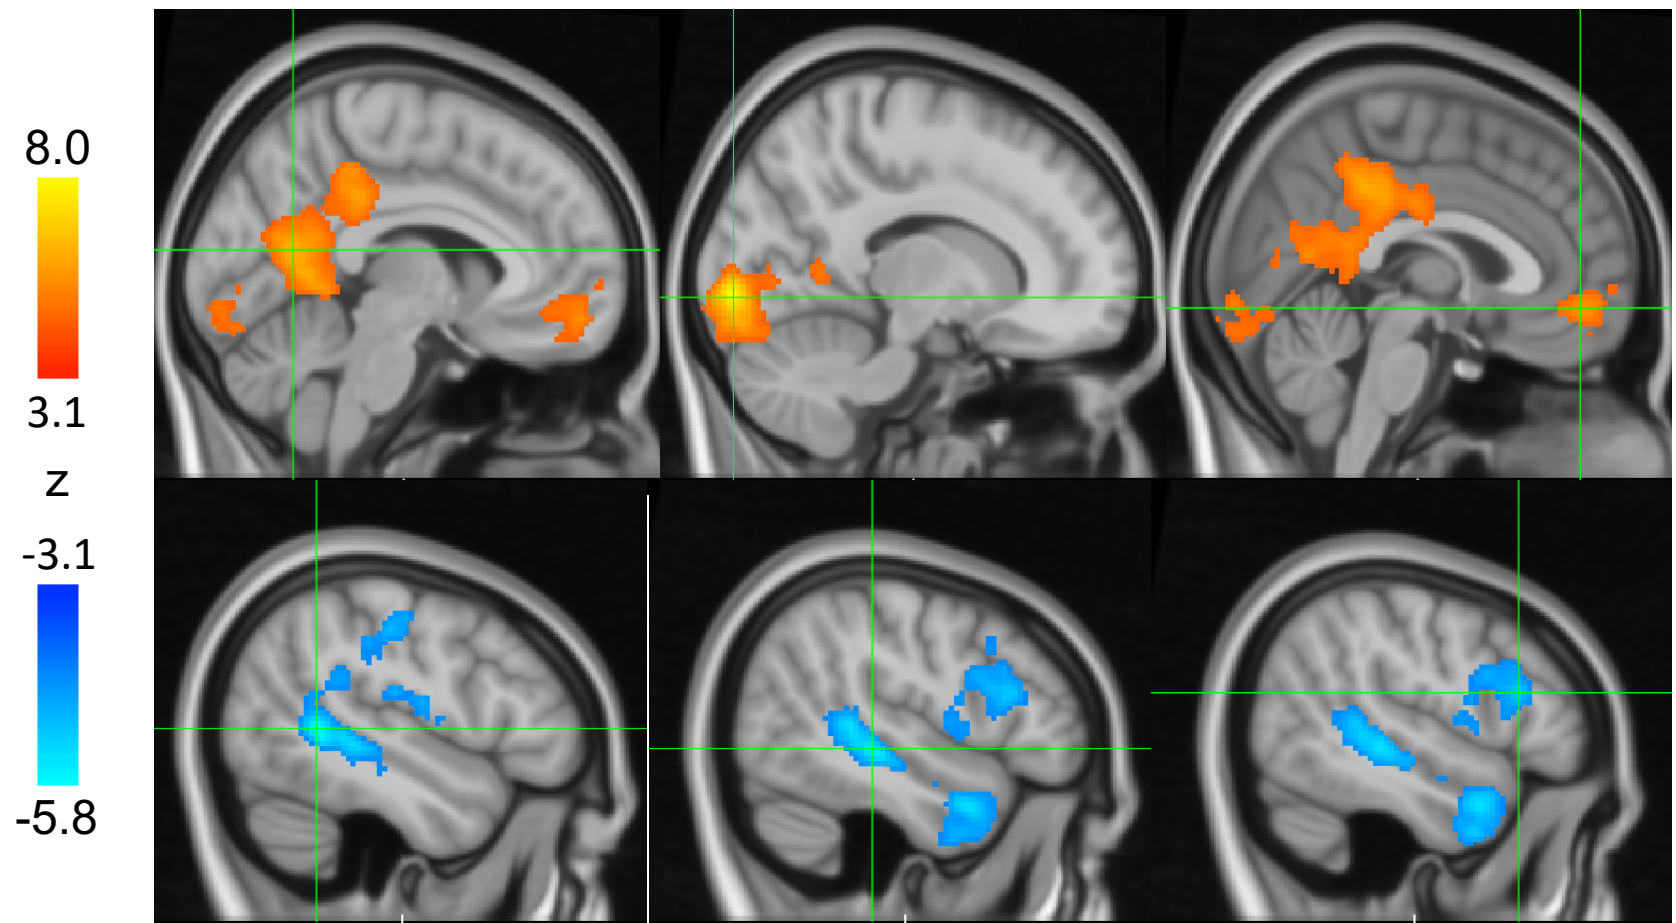

Supplement: 41386_2020_688_MOESM5_ESM.pdf [file 41386_2020_688_MOESM5_ESM.pdf]
