# Supplementary material
Source: PubMed Central journal article supplement (PMC7297974)

### A. Healthy Controls – Week 2 BOLD response to reward anticipation

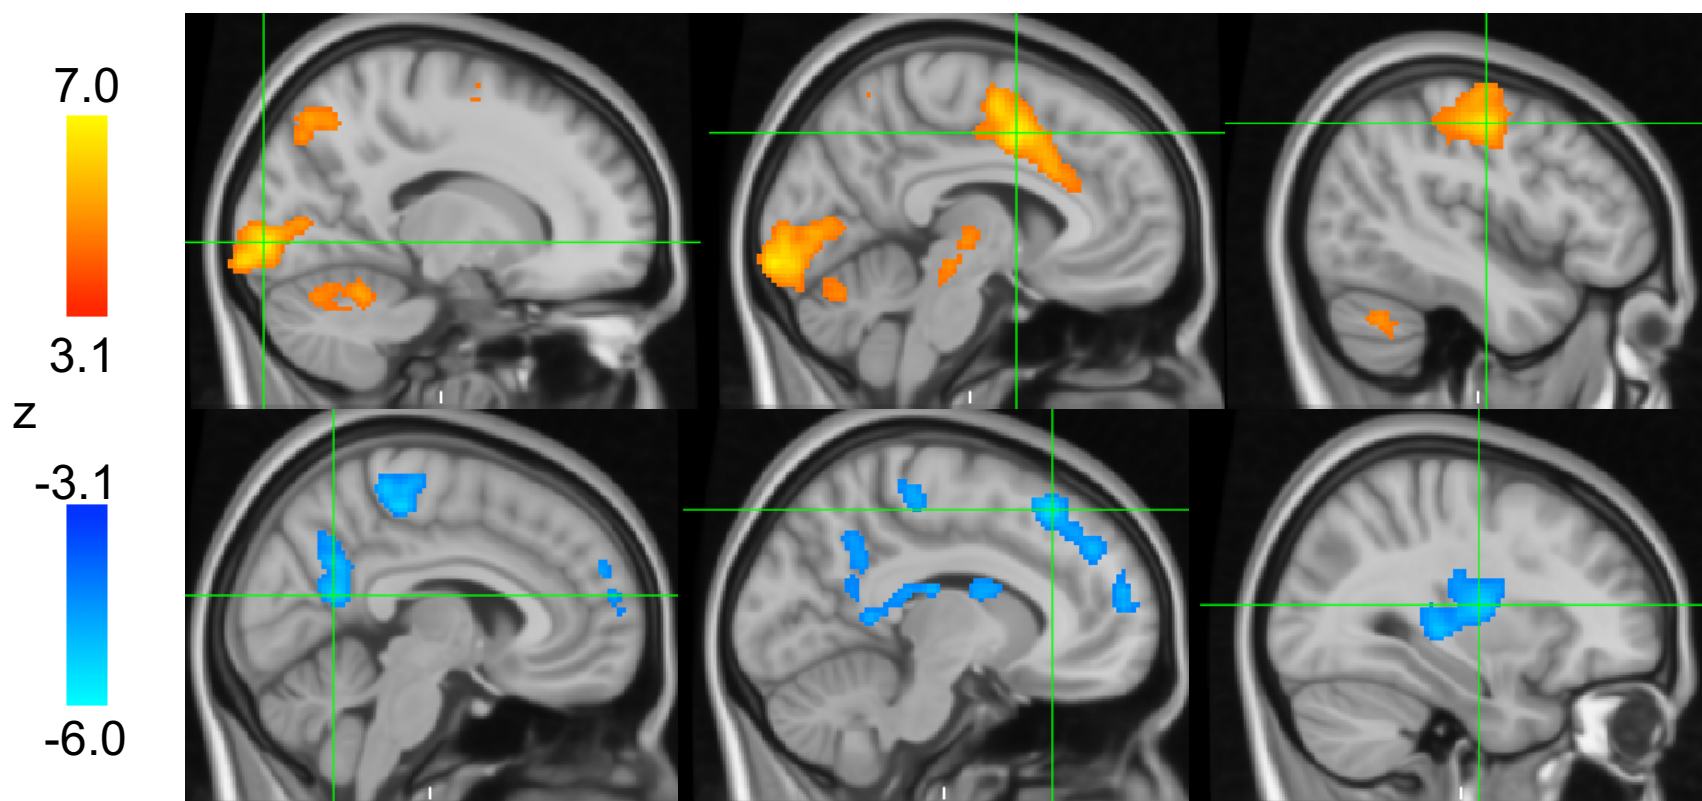

### B. MDD – Week 2 BOLD response to reward anticipation

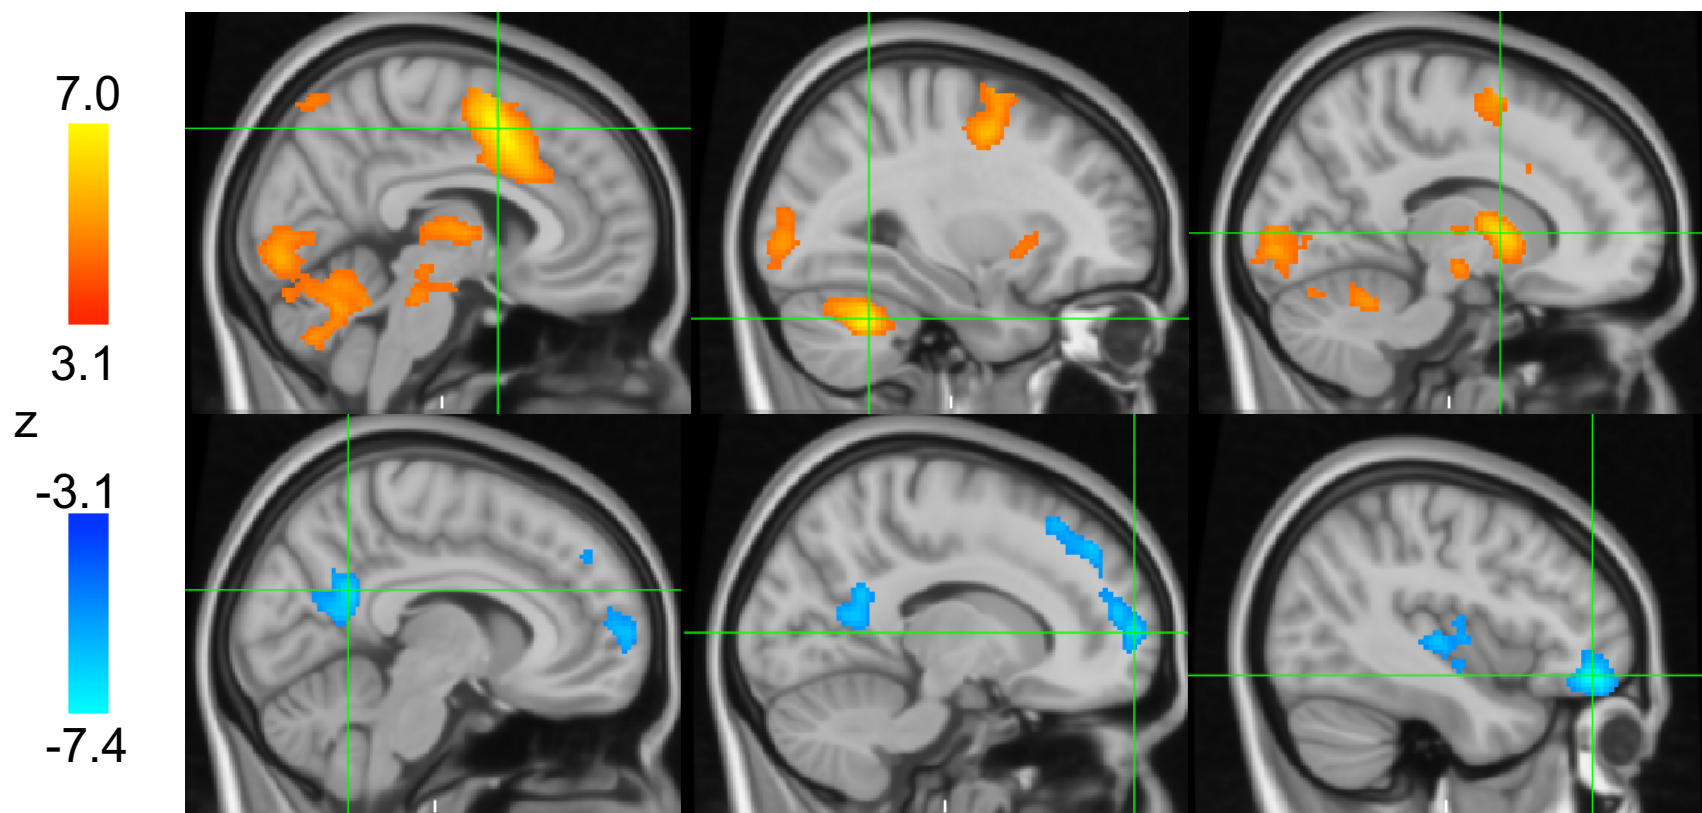

Supplement: 41386_2020_688_MOESM6_ESM.pdf [file 41386_2020_688_MOESM6_ESM.pdf]
