# Supplementary material
Source: PubMed Central journal article supplement (PMC7297974)

A. Healthy Controls – Week 2 BOLD response during reward consumption

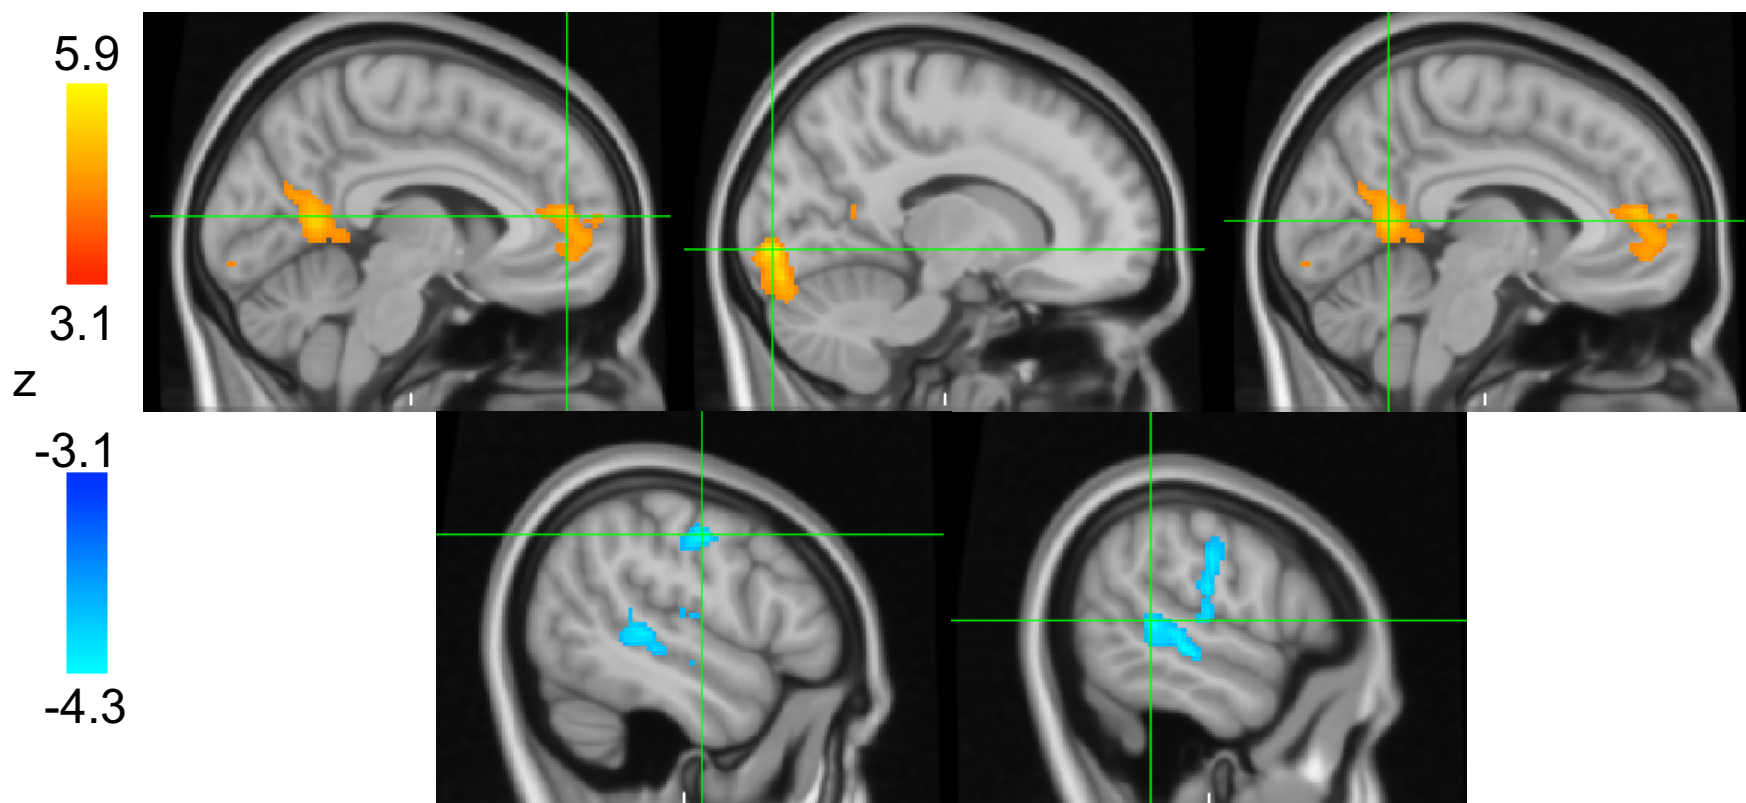

B. MDD – Week 2 BOLD response during reward consumption

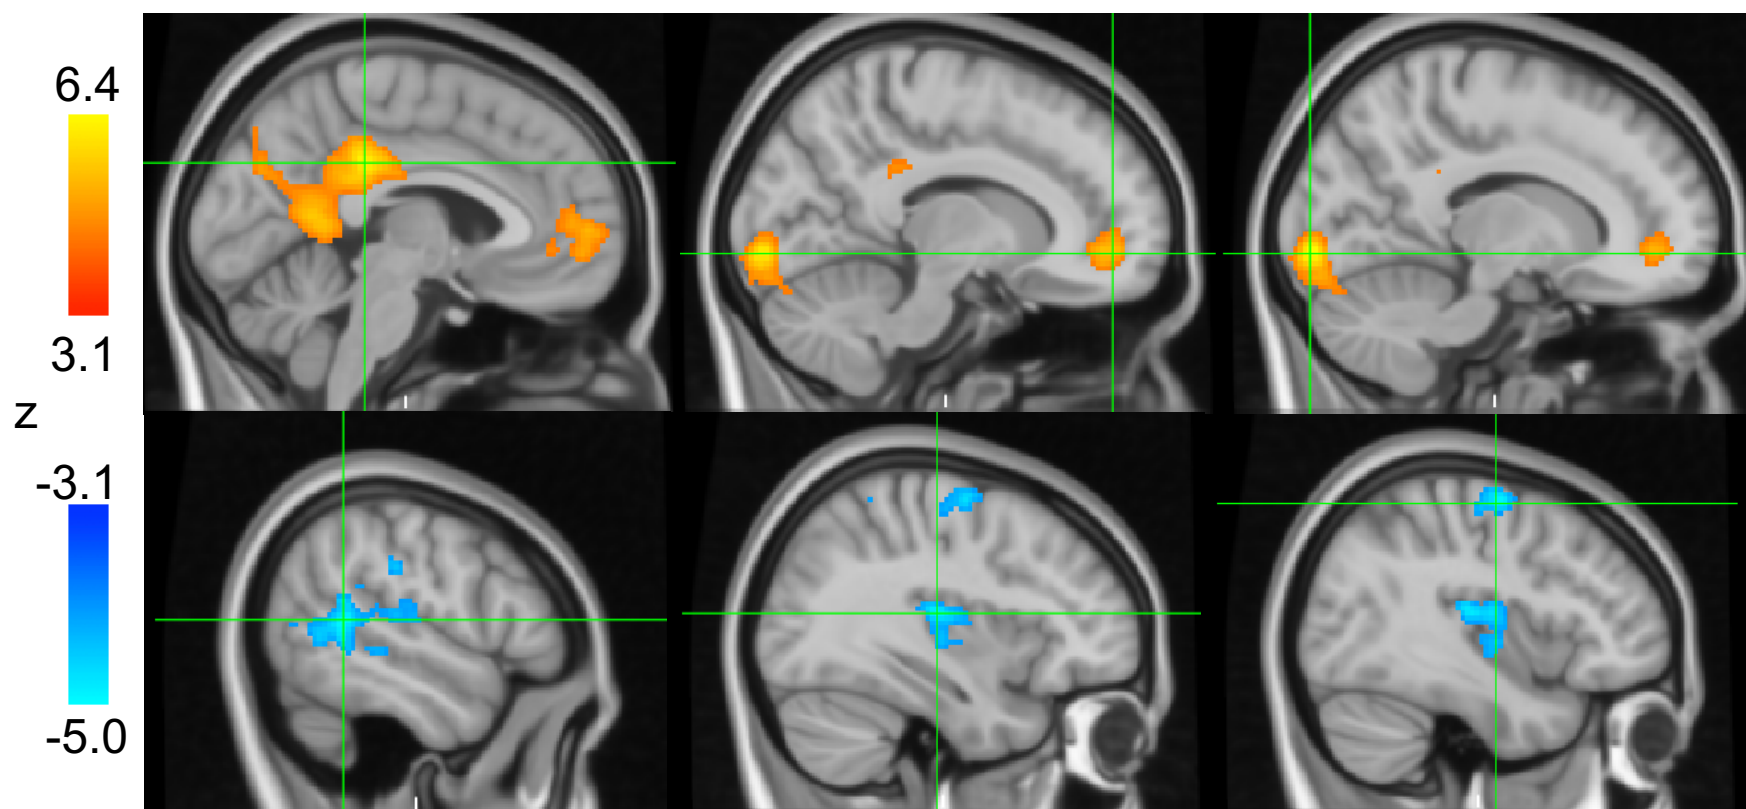

Supplement: 41386_2020_688_MOESM7_ESM.pdf [file 41386_2020_688_MOESM7_ESM.pdf]
